# Supplementary material for: Ionize Hard: Interstellar PO+ Detection
Source: Frontiers journal article supplement (doi:10.3389/fspas.2022.829288), 2022-04-26
Supplement: Data_Sheet_1.pdf [file Data_Sheet_1.pdf]

# Appendices

## APPENDIX A MOLECULAR SPECTROSCOPY

We list in Table A1 the details of the spectroscopy used to fit the molecular emission of the different species analysed in this work. We have used entries from the Cologne Database for Molecular Spectroscopy (CDMS, Endres et al. 2016) and the Jet Propulsion Laboratory (JPL; Pickett et al. 1998), which are based on the laboratory works and theoretical calculations indicated in Table A1.

**Table A1.** Spectroscopy of the molecules analysed in this work. The molecular catalog, number and date of the entry, and the references for the line lists and dipole moments are listed.

| Molecule          | Catalog | Entry | Date          | Line list ref.                                     | Dipole moment ref.                                                |
|-------------------|---------|-------|---------------|----------------------------------------------------|-------------------------------------------------------------------|
| PO <sup>+</sup>   | JPL     | 47005 | December 1996 | Petrmichl et al. (1991)                            | Peterson and Woods (1990);<br>this work                           |
| PO                | CDMS    | 47507 | October 2019  | Kawaguchi et al. (1983),<br>Bailleux et al. (2002) | Kanata et al. (1988)                                              |
| SO <sup>+</sup>   | JPL     | 48010 | December 1996 | Amano et al. (1991)                                | Turner (1992), from<br>Peterson & Woods, priv. comm;<br>this work |
| <sup>34</sup> SO  | CDMS    | 50501 | August 1998   | Tiemann (1974)                                     | Powell and Lide (1964),<br>Lovas et al. (1992) <sup>a</sup>       |
| S <sup>18</sup> O | CDMS    | 50502 | August 1998   | Tiemann (1974)                                     | Powell and Lide (1964),<br>Lovas et al. (1992) <sup>a</sup>       |
| NO <sup>+</sup>   | CDMS    | 30512 | January 2017  | Bowman et al. (1982)                               | Polák and Fišer (2004)                                            |
| NO                | CDMS    | 30517 | January 2015  | Müller et al. (2015)                               | Neumann (1970)                                                    |

(a) The dipole moment of SO was used.

## APPENDIX B CALCULATION OF THE $\text{PO}^+$ DIPOLE MOMENT

Due to the lack of experimental measurements of permanent dipole for the ion  $\text{PO}^+$ , quantum chemical calculations are needed to obtain it. There are previous theoretical calculations of the permanent dipole moment for the cation  $\text{PO}^+(\text{}^1\Sigma)$  (Peterson and Woods 1990), who derived a value of  $\mu=3.44$ . This is the value used in the JPL molecular database entry (47005, December 1996) of  $\text{PO}^+$  (see Table A1). In this work we have carried out new calculations for updating this value. Thus, we optimized the  $\text{PO}^+(\text{}^1\Sigma)$  with the CCSD(T)-F12 method (Adler et al., 2007; Knizia et al., 2009). With the inclusion of the explicit F12 electronic correlation, we can obtain results near the basis set limit with smaller basis sets. To do this, we selected de cc-pVTZ-F12 and cc-pVTZ-F12-CABS as orbital basis set and complete auxiliary basis set respectively. For the correlation and coulomb fitting we increase the size of the basis set to the augmented aug-cc-pVQZ. The coupled cluster calculations showed that the  $T_1$  diagnostic obtained for this molecule is 0.025. The  $T_1$  diagnostic is an indicator of the multi-configurational character of a chemical species (Lee and Taylor, 1989). When this value exceeds 0.020 for a closed shell system or 0.045 for an open shell system, multi-configurational methods are needed to correctly describe the wavenfunction (Rienstra-Kiracofe et al., 2000). In this case, 0.025 lies above the limit for a closed shell system. Thus, our new, and previous coupled cluster calculations (Moussaoui et al., 2003), and those computed with quadratic CI methods (Peterson and Woods, 1990) were not taking into account herein, since multi-configurational calculations are needed to correctly describe this molecule. Recently, high level multi-configurational calculations have been carried out to describe electronic spectroscopic properties of the  $\text{PO}^+$  cation like transition dipole moments between different electronic states (Zhang and Shi, 2021). Previously, multiconfigurational CASSCF calculations have been carried out to compute the permanent dipole moment of  $\text{PO}^+$  (Moussaoui et al., 2003). However dynamic correlation in the inactive orbitals were not taken into account.

In this sense, we optimized the geometry of  $\text{PO}^+(\text{}^1\Sigma)$  with the fully internally contracted CASPT2 method (Andersson et al., 1990; Roca-Sanjuán et al., 2012). For the selection of the active orbitals we chose a full valence active space, namely, the four  $4s$  and  $4p$  electrons of phosphorous cation and the six  $3s$  and  $3p$  electrons of oxygen, leaving a (10e,8o) active space. This system has a non-negligible basis set dependence, then, we started the calculation of CASPT2(10e,8o) in combination with the correlation-consistent basis set aug-cc-pVTZ (Kendall et al., 1992), up to the 6Z (Woon and Dunning, 1993; Peterson et al., 1994; Wilson et al., 1996).

Table B1 shows the computed equilibrium distance ( $r_{\text{P-O}}$ ), harmonic frequency ( $\nu$ ), rotational constant ( $B_e$ ) and the dipole moment ( $\mu$ ) for the cation  $\text{PO}^+(\text{}^1\Sigma)$ . The value of the permanent dipole ( $\mu$ ) used in this work is 3.131 D, computed at the full valence CASPT2(10e,8o)/aug-cc-pV6Z. From previous calculations, the most similar result was obtained with the CASSCF(10e,8o) (Moussaoui et al., 2003).

**Table B1.** Equilibrium distance ( $r_{\text{P-O}}$ ), harmonic frequency ( $\nu$ ), rotational constant ( $B_e$ ), and the dipole moment ( $\mu$ ) for the cation  $\text{PO}^+(\text{}^1\Sigma)$ .

| Basis set                            | $r_{\text{P-O}}$ (Å) | $\nu$ ( $\text{cm}^{-1}$ ) | $B_e$ (MHz) | $\mu$ (Debye) |
|--------------------------------------|----------------------|----------------------------|-------------|---------------|
| CCSD(T)-F12/cc-pVTZ-F12 <sup>a</sup> | 1.4283               | 1415.18                    | 23481.93937 | 3.043         |
| CASPT2(10e,8o)/aug-cc-pVTZ           | 1.4418               | 1379.44                    | 23043.79083 | 3.107         |
| CASPT2(10e,8o)/aug-cc-pVQZ           | 1.4339               | 1389.61                    | 23300.21209 | 3.120         |
| CASPT2(10e,8o)/aug-cc-pV5Z           | 1.4274               | 1402.29                    | 23510.57499 | 3.129         |
| CASPT2(10e,8o)/aug-cc-pV6Z           | 1.4256               | 1412.27                    | 23570.90768 | 3.131         |
| Exp. (Dyke et al., 1982)             | 1.4249               | 1411.50                    | —           | —             |

(a) For the correlation and coulomb fitting the augmented aug-cc-pVQZ was used.

## APPENDIX C CALCULATION OF THE $\text{SO}^+$ DIPOLE MOMENT

The  $\text{SO}^+$  entry (48010, December 1996) of the JPL molecular database assumed a value of 1.0 for the dipole moment. Therefore, the derived column density has to be corrected using the true value of the dipole moment. As in the case of  $\text{PO}^+$  (Zhang and Shi, 2021), transition dipole moments between different electronic states has been computed, obtaining theoretical results in agreement with experiments (Ben Houria et al., 2006; Xing et al., 2012). However, permanent dipole moment measurement for the  $\text{SO}^+(\text{}^2\Pi)$  is needed. Turner (1992) used a value of the dipole moment  $\mu=2.30$  D obtained by Peterson & Woods (priv. comm.). However, no data about the followed methodology have been found. To obtain a reliable value of the dipole moment, we optimized the  $\text{SO}^+$  cation in its doublet ground state ( $\text{}^2\Pi$ ) with the above mentioned coupled cluster method but using the resolution-of-identity (RI) approach for the correlation integrals (Feyereisen et al., 1993) and with the cc-pVQZ-F12 and cc-pVQZ-F12-CABS basis sets. Although the cation  $\text{SO}^+(\text{}^2\Pi)$  is an open shell system, the  $T_1$  diagnostic found for this molecule is 0.022, far from the limit for an open shell system (0.045). Table C1 shows the comparison of our coupled cluster calculations with the available experimental results. The derived dipole moment for the  $\text{SO}^+(\text{}^2\Pi)$  cation obtained and used in this work is 2.016 D, 0.284 D lower than the previous calculation of Peterson & Woods (see Turner 1992).

**Table C1.** Equilibrium distance ( $r_{\text{S-O}}$ ), harmonic frequency ( $\nu$ ), rotational constant ( $B_e$ ), and the dipole moment ( $\mu$ ) for the cation  $\text{SO}^+(\text{}^2\Pi)$ .

| Method                                  | $r_{\text{S-O}}$ (Å) | $\nu$ ( $\text{cm}^{-1}$ ) | $B_e$ (MHz) | $\mu$ (Debye) |
|-----------------------------------------|----------------------|----------------------------|-------------|---------------|
| CCSD(T)-F12/RI/cc-pVQZ-F12 <sup>a</sup> | 1.4256               | 1323.19                    | 23297.53460 | 2.016         |
| Exp. (ref)                              | 1.4245               | 1306.78                    | 23341.60095 | —             |

(a) For the correlation and coulomb fitting the augmented aug-cc-pV5Z was used.

## REFERENCES

- Adler, T. B., Knizia, G., and Werner, H.-J. (2007). A simple and efficient CCSD(T)-F12 approximation. *The Journal of Chemical Physics* 127, 221106. doi:10.1063/1.2817618
- Amano, T., Amano, T., and Warner, H. E. (1991). The microwave spectrum of  $\text{SO}^+$ . *Journal of Molecular Spectroscopy* 146, 519–523. doi:10.1016/0022-2852(91)90023-4
- Andersson, K., Malmqvist, P. A., Roos, B. O., Sadlej, A. J., and Wolinski, K. (1990). Second-order perturbation theory with a CASSCF reference function. *The Journal of Physical Chemistry* 94, 5483–5488. doi:10.1021/j100377a012
- Bailleux, S., Bogey, M., Demuynck, C., Liu, Y., and Walters, A. (2002). Millimeter-Wave Spectroscopy of PO in Excited Vibrational States up to  $v=7$ . *Journal of Molecular Spectroscopy* 216, 465–471. doi:https://doi.org/10.1006/jmsp.2002.8665
- Ben Houria, A., Ben Lakhdar, Z., and Hochlaf, M. (2006). Spectroscopic and spin-orbit calculations on the  $\text{SO}^+$  radical cation. *The Journal of Chemical Physics* 124, 054313. doi:10.1063/1.2163872
- Bowman, W. C., Herbst, E., and De Lucia, F. C. (1982). Millimeter and submillimeter spectrum of  $\text{NO}^+$ . *The Journal of Chemical Physics* 77, 4261–4262. doi:10.1063/1.444307
- Dyke, J. M., Morris, A., and Ridha, A. (1982). Study of the ground state of  $\text{PO}^+$  using photoelectron spectroscopy. *J. Chem. Soc., Faraday Trans. 2* 78, 2077–2082. doi:10.1039/F29827802077
- Endres, C. P., Schlemmer, S., Schilke, P., Stutzki, J., and Müller, H. S. P. (2016). The Cologne Database for Molecular Spectroscopy, CDMS, in the Virtual Atomic and Molecular Data Centre, VAMDC. *Journal of Molecular Spectroscopy* 327, 95–104. doi:10.1016/j.jms.2016.03.005

- Feyereisen, M., Fitzgerald, G., and Komornicki, A. (1993). Use of approximate integrals in ab initio theory. An application in MP2 energy calculations. *Chemical Physics Letters* 208, 359–363. doi:[https://doi.org/10.1016/0009-2614\(93\)87156-W](https://doi.org/10.1016/0009-2614(93)87156-W)
- Kanata, H., Yamamoto, S., and Saito, S. (1988). The dipole moment of the PO radical determined by microwave spectroscopy. *Journal of Molecular Spectroscopy* 131, 89–95. doi:[https://doi.org/10.1016/0022-2852\(88\)90109-9](https://doi.org/10.1016/0022-2852(88)90109-9)
- Kawaguchi, K., Saito, S., and Hirota, E. (1983). Far-infrared laser magnetic resonance detection and microwave spectroscopy of the po radical. *The Journal of Chemical Physics* 79, 629–634. doi:10.1063/1.445810
- Kendall, R. A., Dunning, T. H., and Harrison, R. J. (1992). Electron affinities of the first-row atoms revisited. Systematic basis sets and wave functions. *The Journal of Chemical Physics* 96, 6796–6806. doi:10.1063/1.462569
- Knizia, G., Adler, T. B., and Werner, H.-J. (2009). Simplified CCSD(T)-F12 methods: Theory and benchmarks. *The Journal of Chemical Physics* 130, 054104. doi:10.1063/1.3054300
- Lee, T. J. and Taylor, P. R. (1989). A diagnostic for determining the quality of single-reference electron correlation methods. *International Journal of Quantum Chemistry* 36, 199–207. doi:<https://doi.org/10.1002/qua.560360824>
- Lovas, F. J., Suenram, R. D., Ogata, T., and Yamamoto, S. (1992). Microwave Spectra and Electric Dipole Moments for Low- J Levels of Interstellar Radicals: SO, C 2S, C 3S, c-HC 3, CH 2CC, and c-C 3H 2. *ApJ* 399, 325. doi:10.1086/171928
- Moussaoui, Y., Ouamerali, O., and Maré, G. R. D. (2003). Properties of the phosphorus oxide radical, PO, its cation and anion in their ground electronic states: comparison of theoretical and experimental data. *International Reviews in Physical Chemistry* 22, 641–675. doi:10.1080/01442350310001617011
- Müller, H. S., Kobayashi, K., Takahashi, K., Tomaru, K., and Matsushima, F. (2015). Terahertz spectroscopy of N<sup>18</sup>O and isotopic invariant fit of several nitric oxide isotopologs. *Journal of Molecular Spectroscopy* 310, 92–98. doi:<https://doi.org/10.1016/j.jms.2014.12.002>. Spectroscopy of Radicals and Ions in Memory of Marilyn Jacox
- Neumann, R. M. (1970). High-Precision Radiofrequency Spectrum of <sup>14</sup>N <sup>16</sup>O. *ApJ* 161, 779. doi:10.1086/150578
- Peterson, K. A. and Woods, R. C. (1990). Configuration interaction potential energy and dipole moment functions for thirteen 22 electron diatomics. *The Journal of Chemical Physics* 92, 6061–6068. doi:10.1063/1.458378
- Peterson, K. A., Woon, D. E., and Dunning, T. H. (1994). Benchmark calculations with correlated molecular wave functions. IV. The classical barrier height of the H+H<sub>2</sub>→H<sub>2</sub>+H reaction. *The Journal of Chemical Physics* 100, 7410–7415. doi:10.1063/1.466884
- Petrnichl, R. H., Peterson, K. A., and Woods, R. C. (1991). The microwave spectrum of PO<sup>+</sup>: Comparison to SiF<sup>+</sup>. *The Journal of Chemical Physics* 94, 3504–3510. doi:10.1063/1.459771
- Pickett, H. M., Poynter, R. L., Cohen, E. A., Delitsky, M. L., Pearson, J. C., and Müller, H. S. P. (1998). Submillimeter, millimeter and microwave spectral line catalog. *JQSRT* 60, 883–890. doi:10.1016/S0022-4073(98)00091-0
- Polák, R. and Fišer, J. (2004). A comparative icMRCI study of some NO<sup>+</sup>, NO and NO<sup>-</sup> electronic ground state properties. *Chemical Physics* 303, 73–83. doi:<https://doi.org/10.1016/j.chemphys.2004.04.027>
- Powell, F. X. and Lide, D. R. (1964). Microwave spectrum of the so radical. *The Journal of Chemical Physics* 41, 1413–1419. doi:10.1063/1.1726082

- Rienstra-Kiracofe, J. C., Allen, W. D., and Schaefer, H. F. (2000). The  $C_2H_5 + O_2$  Reaction Mechanism: High-Level ab Initio Characterizations. *The Journal of Physical Chemistry A* 104, 9823–9840. doi:10.1021/jp001041k
- Roca-Sanjuán, D., Aquilante, F., and Lindh, R. (2012). Multiconfiguration second-order perturbation theory approach to strong electron correlation in chemistry and photochemistry. *WIREs Computational Molecular Science* 2, 585–603. doi:https://doi.org/10.1002/wcms.97
- Tiemann, E. (1974). Microwave Spectra of Molecules of Astrophysical Interest VIII. Sulfur Monoxide. *Journal of Physical and Chemical Reference Data* 3, 259–268. doi:10.1063/1.3253141
- Turner, B. E. (1992). Detection of Interstellar  $SO^+$ : A Diagnostic of Dissociative Shock Chemistry. *ApJL* 396, L107. doi:10.1086/186528
- Wilson, A. K., van Mourik, T., and Dunning, T. H. (1996). Gaussian basis sets for use in correlated molecular calculations. VI. Sextuple zeta correlation consistent basis sets for boron through neon. *Journal of Molecular Structure: THEOCHEM* 388, 339–349. doi:https://doi.org/10.1016/S0166-1280(96)80048-0
- Woon, D. E. and Dunning, T. H. (1993). Gaussian basis sets for use in correlated molecular calculations. III. The atoms aluminum through argon. *The Journal of Chemical Physics* 98, 1358–1371. doi:10.1063/1.464303
- Xing, W., Shi, D., Sun, J., and Zhu, Z. (2012). Investigation of Spectroscopic Properties and Spin-Orbit Splitting in the  $X2\pi$  and  $A2\pi$  Electronic States of the  $SO^+$  Cation. *International Journal of Molecular Sciences* 13, 8189–8209. doi:10.3390/ijms13078189
- Zhang, M. and Shi, D. (2021). Transition properties of  $X1\Sigma^+$ ,  $A1\Sigma^-$ ,  $B1\Delta$ ,  $C1\Pi$ ,  $a3\Sigma^+$ ,  $b3\Delta$ ,  $c3\Pi$ , and  $d3\Sigma^-$  states of  $PO^+$ . *Journal of Quantitative Spectroscopy and Radiative Transfer* 264, 107553. doi:https://doi.org/10.1016/j.jqsrt.2021.107553
